# Supplementary material for: Theoretical Study on the Structures, Electronic Properties, and Aromaticity of Thiophene Analogues of Anti-Kekulene
Source: MDPI journal article supplement (doi:10.3390/chemistry4040102), 2022-11-11
Supplement: s1 [file s1]

Supporting Information for

**Theoretical Study on the Structures, Electronic Properties, and Aromaticity of Thiophene Analogues of Anti-Kekulene**

*Shingo Hashimoto and Kazukuni Tahara*

*Department of Applied Chemistry, School of Science and Technology, Meiji University, 1-1-1 Higashimita, Tama-ku, Kawasaki, Kanagawa, 214-8571, Japan.*

Correspondence author: tahara@meiji.ac.jp

This file includes:

|                                                                                |     |
|--------------------------------------------------------------------------------|-----|
| <b>1. Strain Energy Calculations</b>                                           | S2  |
| <b>2. Molecular Planarity Analysis</b>                                         | S3  |
| <b>3. Structures and Aromaticity of Benzene, Thiophene, and Cyclobutadiene</b> | S4  |
| <b>4. NICS(1)<sub>zz</sub> Values on the Concave Face</b>                      | S5  |
| <b>5. LOL-<math>\pi</math> Isosurfaces of 1-3</b>                              | S6  |
| <b>6. Molecular Orbital Diagrams</b>                                           | S7  |
| <b>7. Signed Modules of Current Densities</b>                                  | S9  |
| <b>8. Calculated Atomic Charge</b>                                             | S11 |
| <b>9. Cartesian Coordinates</b>                                                | S13 |

## 1. Strain Energy Calculations

**Table S1.** Calculated zero-point-corrected total energies (ZPEs), ZPEs per a thiophene unit, relative strain energies per a thiophene unit, and total relative energies ( $E_{\text{strain}}$ ) of **1–4**.

| compound | ZPE value<br>(hartree) | ZPE value per a<br>thiophene unit<br>(hartree) | relative strain<br>energy per a<br>thiophene unit<br>(kcal/mol) | $E_{\text{strain}}$<br>value<br>(kcal/mol) |
|----------|------------------------|------------------------------------------------|-----------------------------------------------------------------|--------------------------------------------|
| <b>1</b> | −3303.318346           | −550.553058                                    | 4.74                                                            | 28.4                                       |
| <b>2</b> | −3853.897978           | −550.556854                                    | 2.35                                                            | 16.5                                       |
| <b>3</b> | −4404.473706           | −550.559213                                    | 0.87                                                            | 7.0                                        |
| <b>4</b> | −4955.045438           | −550.560604                                    | 0.00                                                            | 0.0                                        |

## 2. Molecular Planarity Analysis

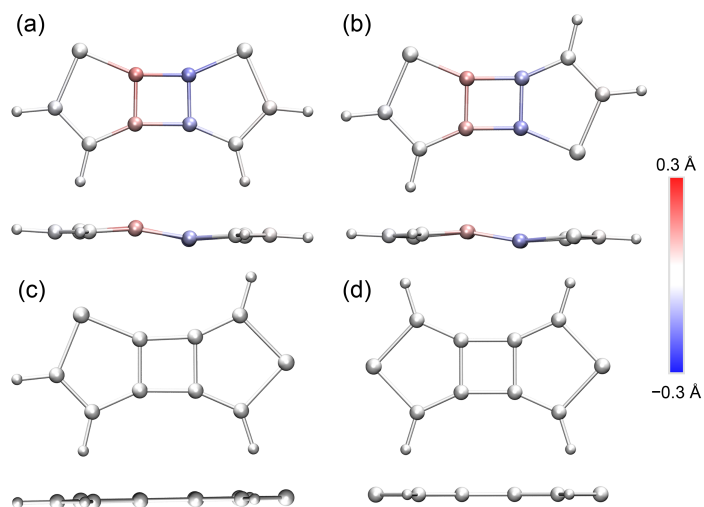

**Figure S1.** Results of the molecular planarity analysis for *syn*- (a) and *anti-bb*CDTs (b), *bc*CDT (c), and *cc*CDT (d). The atoms with large distance from the fitting plane are colored by red (+) or blue (-).

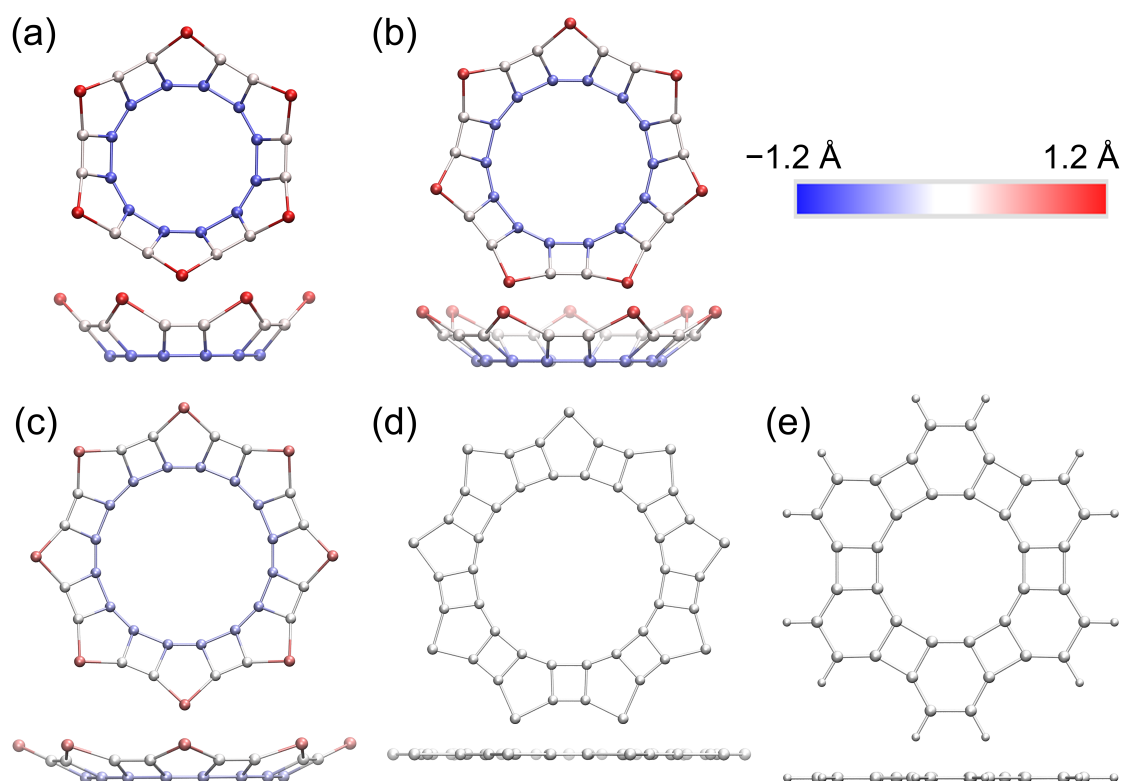

**Figure S2.** Results of the molecular planarity analysis for **1** (a), **2** (b), **3** (c), **4** (d), and anti-kekulene (e). The atoms with large distance from the fitting plane are colored by red (+) or blue (-).

### 3. Structures and Aromaticity of Benzene, Thiophene, and Cyclobutadiene

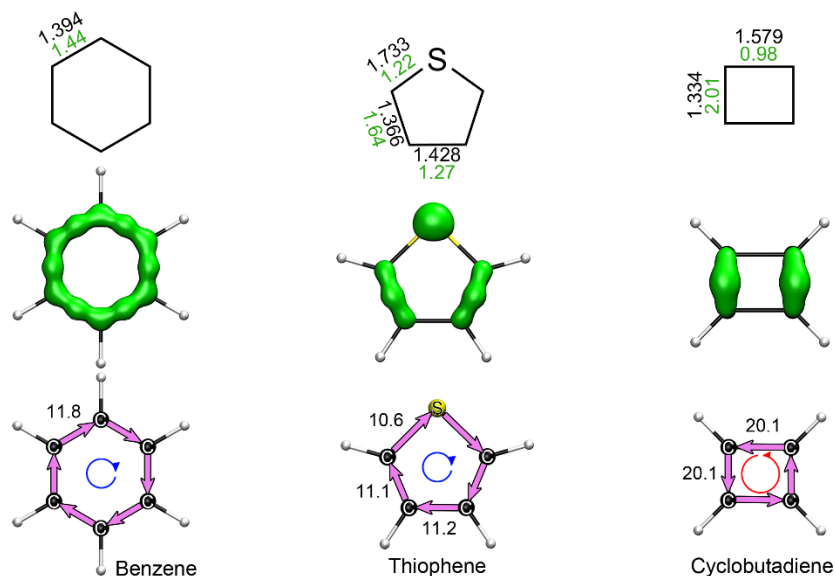

**Figure S3.** (Top row) Bond lengths (black numbers) and WBI values (green numbers) of benzene, thiophene, and cyclobutadiene. (Middle row) LOL- $\pi$  isosurfaces (isovalue of 0.55 a.u. for benzene and 0.60 a.u. for the others, middle) of benzene, thiophene, and cyclobutadiene. (Bottom row) Paths and strengths (nA/T) of magnetically induced currents at each bond of benzene, thiophene, and cyclobutadiene.

**Table S2.** HOMA and MCI values of benzene and thiophene and the NICS(1)<sub>zz</sub> values of benzene, thiophene, and cyclobutadiene.

| compound       | HOMA value | MCI value | NICS(1) <sub>zz</sub> value (ppm) |
|----------------|------------|-----------|-----------------------------------|
| benzene        | 0.991      | 0.0870    | −29.3                             |
| thiophene      | 0.751      | 0.0750    | −28.0                             |
| cyclobutadiene | ---        | ---       | 55.5                              |



#### 4. NICS(1)<sub>zz</sub> Values on the Concave Face

The NICS(1)<sub>zz</sub> values of bowl-shaped compounds **1–3** calculated on the concave face of the bowl were summarized in Table S3. The results are in agreement with those on the convex face.

**Table S3.** NICS(1)<sub>zz</sub> values on the concave faces of bowl-shaped molecules **1–3** (ppm).

| compound | 4MR  | thiophene ring | macrocyclic center |
|----------|------|----------------|--------------------|
| <b>1</b> | 7.7  | −1.3           | 6.8                |
| <b>2</b> | 9.9  | −0.8           | 5.5                |
| <b>3</b> | 10.7 | −0.5           | 5.5                |

## 5. LOL- $\pi$ Isosurfaces of 1–3

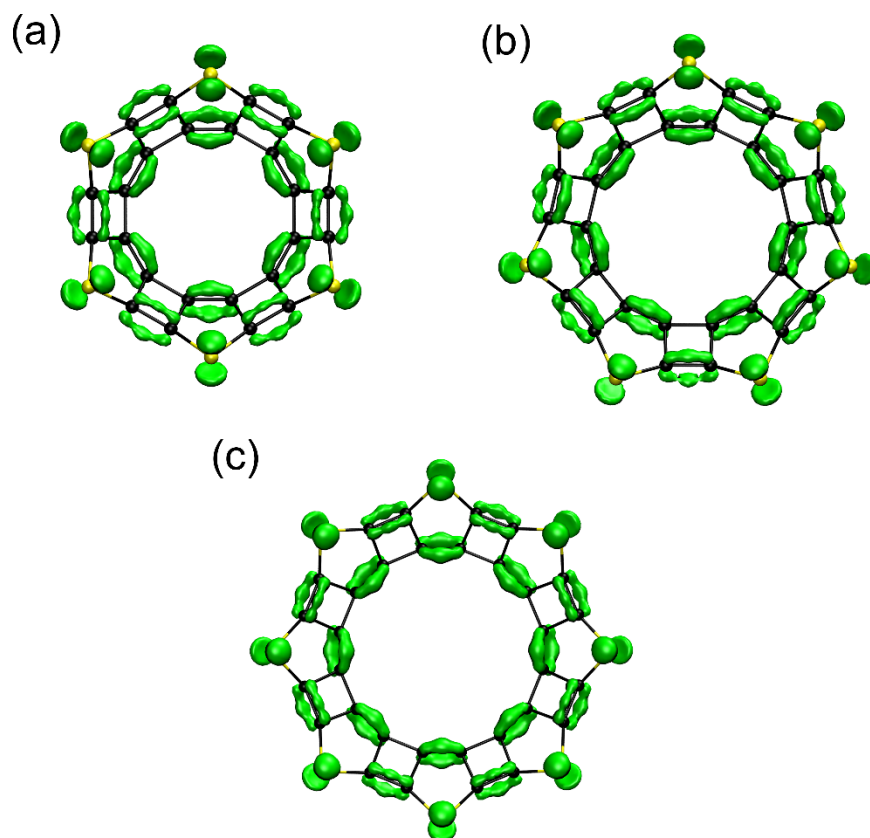

**Figure S4.** LOL- $\pi$  isosurfaces (isovalued: 0.60 a.u.) of **1** (a), **2** (b), and **3** (c).

## 6. Molecular Orbital Diagrams

The HOMO and LUMO energy levels of *bc*CDT are decreased and increased, respectively, compared with those of *bb*CDTs, resulting in a larger  $E_{\text{Gap}}$  value. From the comparison between *bc*CDT and *cc*CDT, the LUMO level is almost the same, while the HOMO level of *cc*CDT is lower than that of *bc*CDT. Thus, *cc*CDT has the largest  $E_{\text{Gap}}$  value.

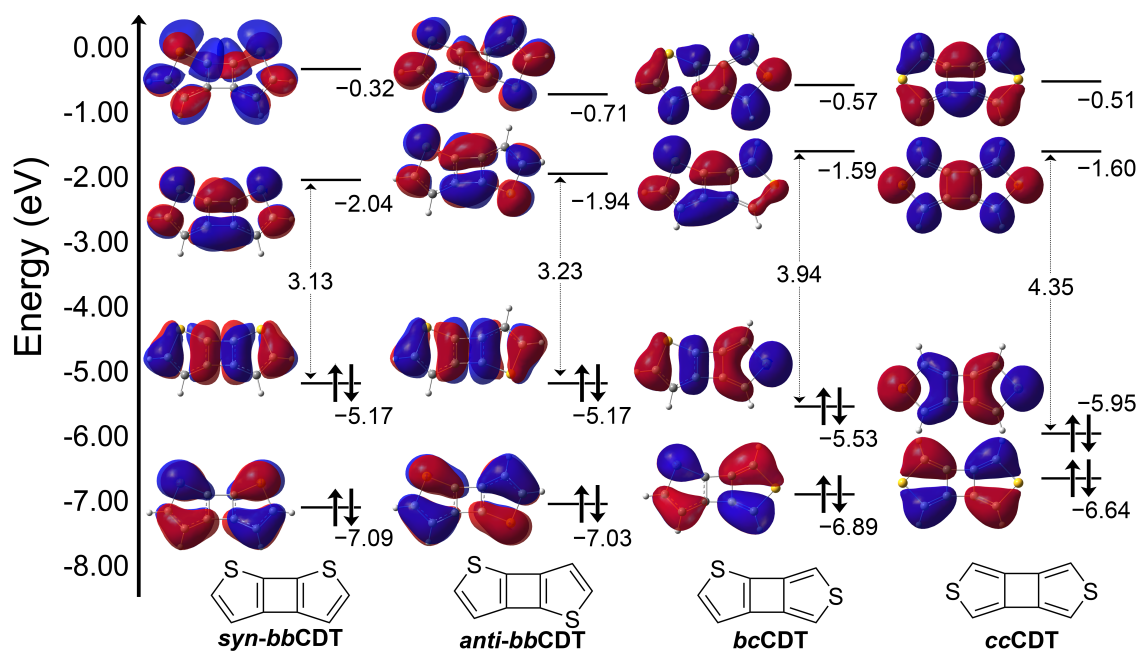

**Figure S5.** Molecular orbital diagrams of *bb*CDT, *bc*CDT, and *cc*CDT (isosurface values: 0.020 a.u.).

Compounds **2** and **4** have the doubly-degenerated LUMOs, whereas the other two compounds show no degeneracy in the LUMOs. It should be noted that there are only little differences in the energy levels of the HOMO and LUMO among the four compounds. Anti-kekulene also has the pseudo-doubly-degenerated LUMOs.

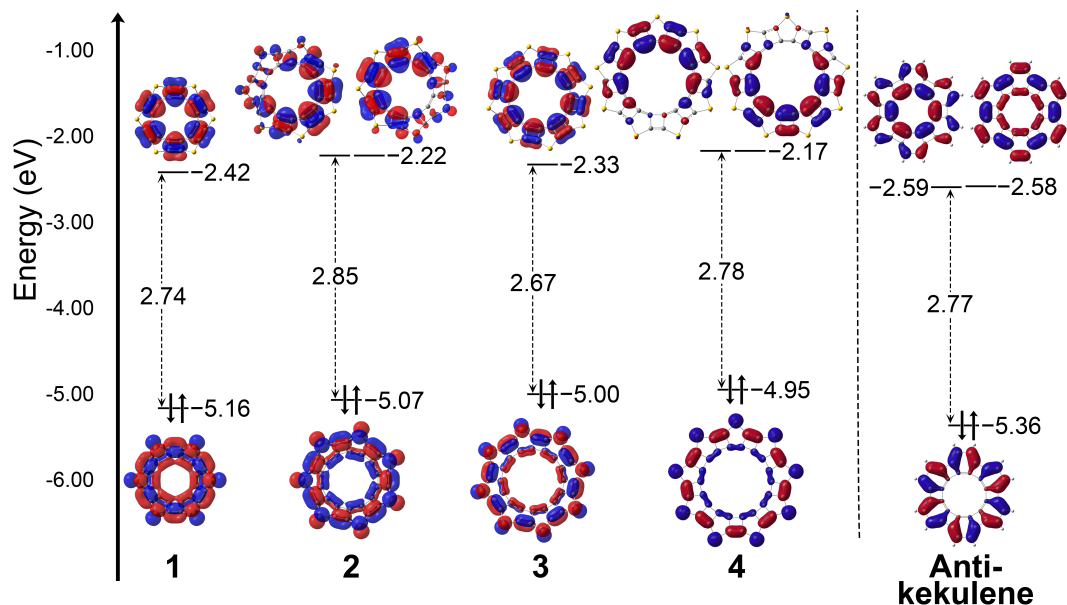

**Figure S6.** Molecular orbital diagrams of **1–4** and anti-kekulene (isosurface values: 0.020 a.u.).

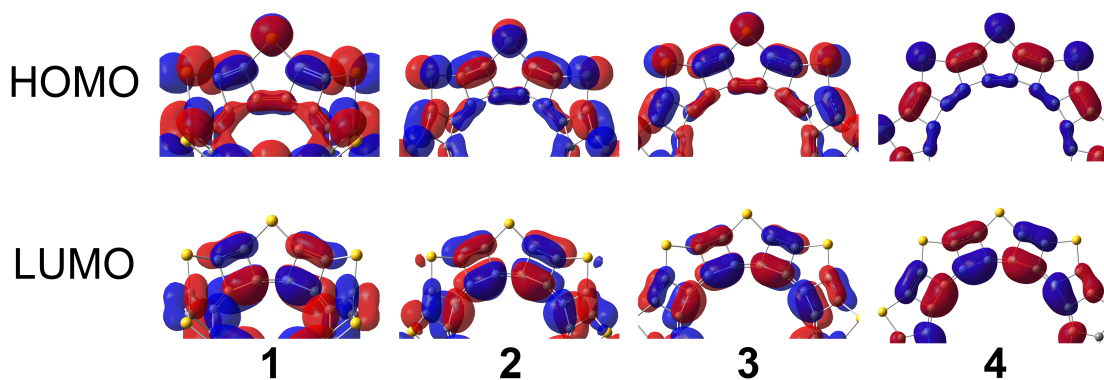

**Figure S7.** Zoomed frontier molecular orbital distributions for **1–4**.

## 7. Signed Modules of Current Densities

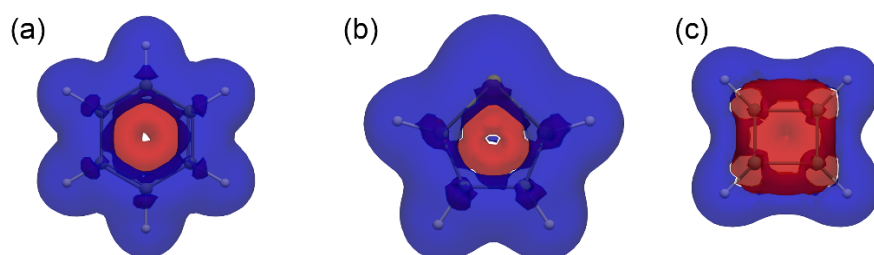

**Figure S8.** Signed modules of the current densities (isovalue: 0.010 a.u.) for benzene (a), thiophene (b), and cyclobutadiene (c). Diatropic and paratropic currents are shown in blue and red, respectively.

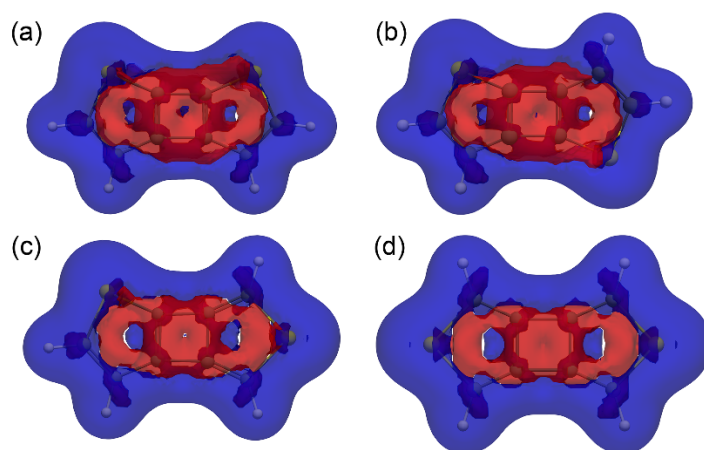

**Figure S9.** Signed modules of the current densities (isovalue: 0.010 a.u.) for *syn-bbCDT* (a), *anti-bbCDT* (b), *bcCDT* (c), and *ccCDT* (d). Diatropic and paratropic currents are shown in blue and red, respectively.

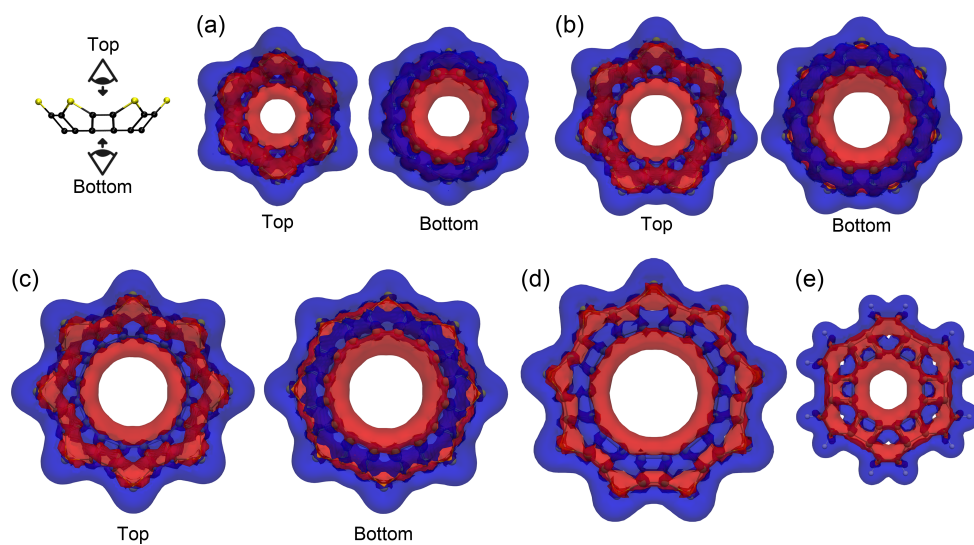

**Figure S10.** Signed modules of the current densities (isovalue: 0.010 a.u.) for **1** (a), **2** (b), **3** (c), **4** (d), and anti-kekulene (e). Diatropic and paratropic currents are shown in blue and red, respectively.

## 8. Calculated Atomic Charge

We calculated atomic charges by the Hirshfeld [101] and natural population analyses (NPA) [83] at B3LYP/6-311G(d,p) level. The calculation of Hirshfeld and NPA charge were performed using the Multiwfn program (version 3.8) [78] and NBO 3.1 program [84] implemented in the Gaussian 16 program, respectively. While the Hirshfeld method tends to give positively or negatively smaller charge values compared to those calculated by the natural population method generally [102–104], both methods qualitatively give the same results. The charges of all sulfur atoms are positive. Moreover, in the case of **1–4**, the carbon atoms located the macrocyclic ring inside are close to zero compared with those of outside ones.

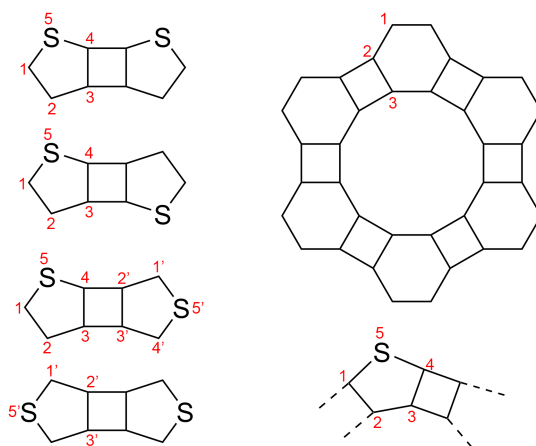

**Figure S11.** Atom numberings of the CDTs, anti-kekulene, and the thiophene analogues of anti-kekulene.

**Table S4.** The calculated Hirshfeld atomic charges of all atoms (a.u.).

| compd.             | atom positions      |                     |                     |                     |                   |
|--------------------|---------------------|---------------------|---------------------|---------------------|-------------------|
|                    | 1<br>(1')           | 2<br>(2')           | 3<br>(3')           | 4<br>(4')           | 5<br>(5')         |
| <i>syn-bb</i> CDT  | −0.0754             | −0.0561             | −0.0240             | −0.0475             | 0.1053            |
| <i>anti-bb</i> CDT | −0.0779             | −0.0568             | −0.0281             | −0.0448             | 0.1067            |
| <i>bc</i> CDT      | −0.0659<br>(−0.069) | −0.0539<br>(−0.025) | −0.0169<br>(−0.023) | −0.0339<br>(−0.069) | 0.1077<br>(0.036) |
| <i>cc</i> CDT      | (−0.067)            | (−0.022)            | (−0.022)            | (−0.067)            | (0.068)           |
| anti-kekulene      | −0.0392             | 0.0005              | −0.0059             |                     |                   |
| <b>1</b>           | −0.0284             | −0.0105             | −0.0104             | −0.0284             | 0.0776            |
| <b>2</b>           | −0.0291             | −0.0108             | −0.0108             | −0.0291             | 0.0798            |
| <b>3</b>           | −0.0294             | −0.0115             | −0.0106             | −0.0295             | 0.0811            |
| <b>4</b>           | −0.0306             | −0.0107             | −0.0107             | −0.0306             | 0.0826            |

**Table S5.** The calculated NPA charges of all atoms (a.u.).

| compd.             | atom positions     |                    |                    |                    |                  |
|--------------------|--------------------|--------------------|--------------------|--------------------|------------------|
|                    | 1<br>(1')          | 2<br>(2')          | 3<br>(3')          | 4<br>(4')          | 5<br>(5')        |
| <i>syn-bb</i> CDT  | −0.382             | −0.253             | −0.043             | −0.228             | 0.463            |
| <i>anti-bb</i> CDT | −0.384             | −0.252             | −0.067             | −0.204             | 0.463            |
| <i>bc</i> CDT      | −0.360<br>(−0.344) | −0.251<br>(−0.069) | −0.048<br>(−0.048) | −0.198<br>(−0.346) | 0.450<br>(0.315) |
| <i>cc</i> CDT      | (−0.350)           | (−0.062)           | (−0.062)           | (−0.350)           | (0.369)          |
| anti-kekulene      | −0.197             | 0.007              | −0.019             |                    |                  |
| <b>1</b>           | −0.160             | −0.022             | −0.022             | −0.160             | 0.363            |
| <b>2</b>           | −0.163             | −0.023             | −0.023             | −0.163             | 0.371            |
| <b>3</b>           | −0.165             | −0.024             | −0.022             | −0.166             | 0.376            |
| <b>4</b>           | −0.168             | −0.022             | −0.022             | −0.168             | 0.380            |



## 9. Cartesian Coordinates

### *syn-bb*CDT

| Symbol | X         | Y         | Z         |
|--------|-----------|-----------|-----------|
| C      | -0.032016 | 3.006531  | 0.482464  |
| C      | 0.000470  | 2.053501  | 1.489900  |
| C      | 0.108032  | 0.768364  | 0.936366  |
| C      | 0.145147  | 0.746047  | -0.445115 |
| S      | -0.000470 | 2.310677  | -1.119002 |
| H      | 0.010378  | 4.080137  | 0.582153  |
| H      | -0.029640 | 2.306981  | 2.540194  |
| C      | -0.145147 | -0.746047 | -0.445115 |
| C      | -0.108032 | -0.768364 | 0.936366  |
| C      | -0.000470 | -2.053501 | 1.489900  |
| C      | 0.032016  | -3.006531 | 0.482464  |
| S      | 0.000470  | -2.310677 | -1.119002 |
| H      | 0.029640  | -2.306981 | 2.540194  |
| H      | -0.010378 | -4.080137 | 0.582153  |

Zero-point correction= 0.090096 (Hartree/Particle)

Thermal correction to Energy= 0.097975

Thermal correction to Enthalpy= 0.098919

Thermal correction to Gibbs Free Energy= 0.057094

Sum of electronic and zero-point Energies= -1103.555889

Sum of electronic and thermal Energies= -1103.548009

Sum of electronic and thermal Enthalpies= -1103.547065

Sum of electronic and thermal Free Energies= -1103.588891

***anti-bb*CDT**

| Symbol | X         | Y         | Z         |
|--------|-----------|-----------|-----------|
| C      | 2.934550  | 0.711677  | 0.035367  |
| C      | 1.838132  | 1.558101  | -0.001993 |
| C      | 0.656974  | 0.805891  | -0.103321 |
| C      | 0.841979  | -0.562468 | -0.134848 |
| S      | 2.493026  | -0.979319 | 0.010591  |
| H      | 3.979949  | 0.976132  | -0.000481 |
| H      | 1.922776  | 2.635171  | 0.023345  |
| C      | -0.841979 | 0.562468  | 0.134848  |
| C      | -0.656974 | -0.805891 | 0.103321  |
| C      | -1.838132 | -1.558101 | 0.001993  |
| C      | -2.934550 | -0.711677 | -0.035367 |
| S      | -2.493026 | 0.979319  | -0.010591 |
| H      | -1.922776 | -2.635171 | -0.023345 |
| H      | -3.979949 | -0.976132 | 0.000481  |

Zero-point correction= 0.090119 (Hartree/Particle)

Thermal correction to Energy= 0.097996

Thermal correction to Enthalpy= 0.098940

Thermal correction to Gibbs Free Energy= 0.056449

Sum of electronic and zero-point Energies= -1103.556429

Sum of electronic and thermal Energies= -1103.548552

Sum of electronic and thermal Enthalpies= -1103.547607

Sum of electronic and thermal Free Energies= -1103.590098

**bcCDT**

| Symbol | X         | Y         | Z        |
|--------|-----------|-----------|----------|
| C      | -0.391540 | 2.201984  | 0.000000 |
| C      | 0.000000  | 0.917753  | 0.000000 |
| C      | -1.085164 | -0.053926 | 0.000000 |
| C      | -2.311876 | 0.490654  | 0.000000 |
| S      | -2.171052 | 2.268869  | 0.000000 |
| H      | 0.170372  | 3.122674  | 0.000000 |
| H      | -3.293673 | 0.043552  | 0.000000 |
| C      | -0.060669 | -1.164191 | 0.000000 |
| C      | 0.380755  | -2.504523 | 0.000000 |
| C      | 0.962218  | -0.228948 | 0.000000 |
| C      | 1.759246  | -2.544532 | 0.000000 |
| H      | -0.235496 | -3.392089 | 0.000000 |
| S      | 2.511294  | -0.959166 | 0.000000 |
| H      | 2.397118  | -3.415011 | 0.000000 |

Zero-point correction= 0.090521 (Hartree/Particle)

Thermal correction to Energy= 0.098264

Thermal correction to Enthalpy= 0.099208

Thermal correction to Gibbs Free Energy= 0.057173

Sum of electronic and zero-point Energies= -1103.581040

Sum of electronic and thermal Energies= -1103.573297

Sum of electronic and thermal Enthalpies= -1103.572353

Sum of electronic and thermal Free Energies= -1103.614388

ccCDT

| Symbol | X        | Y         | Z         |
|--------|----------|-----------|-----------|
| C      | 0.000000 | 1.283121  | 1.979581  |
| C      | 0.000000 | 0.724724  | 0.749198  |
| C      | 0.000000 | -0.724724 | 0.749198  |
| C      | 0.000000 | -1.283121 | 1.979581  |
| S      | 0.000000 | 0.000000  | 3.191769  |
| H      | 0.000000 | 2.312598  | 2.301496  |
| H      | 0.000000 | -2.312598 | 2.301496  |
| C      | 0.000000 | -0.724724 | -0.749198 |
| C      | 0.000000 | -1.283121 | -1.979581 |
| C      | 0.000000 | 0.724724  | -0.749198 |
| S      | 0.000000 | 0.000000  | -3.191769 |
| H      | 0.000000 | -2.312598 | -2.301496 |
| C      | 0.000000 | 1.283121  | -1.979581 |
| H      | 0.000000 | 2.312598  | -2.301496 |

Zero-point correction= 0.090691 (Hartree/Particle)

Thermal correction to Energy= 0.098268

Thermal correction to Enthalpy= 0.099212

Thermal correction to Gibbs Free Energy= 0.059032

Sum of electronic and zero-point Energies= -1103.592129

Sum of electronic and thermal Energies= -1103.584553

Sum of electronic and thermal Enthalpies= -1103.583609

Sum of electronic and thermal Free Energies= -1103.623788

## Anti-kekulene

| Symbol | X         | Y         | Z         |
|--------|-----------|-----------|-----------|
| C      | -1.378880 | 3.909637  | 0.000111  |
| C      | -0.674199 | 2.643600  | 0.003846  |
| C      | 0.674199  | 2.643600  | -0.003846 |
| C      | 1.378880  | 3.909637  | -0.000111 |
| C      | 0.722817  | 5.114389  | 0.000080  |
| C      | -0.722817 | 5.114389  | -0.000080 |
| H      | 1.249870  | 6.060926  | 0.001337  |
| H      | -1.249870 | 6.060926  | -0.001337 |
| C      | -1.952325 | 1.905673  | -0.003846 |
| C      | -2.696405 | 3.148964  | -0.000111 |
| C      | -2.626524 | 0.737927  | 0.003846  |
| C      | -4.067782 | 3.183172  | 0.000080  |
| C      | -4.075285 | 0.760673  | 0.000111  |
| C      | -4.790599 | 1.931217  | -0.000080 |
| H      | -4.623981 | 4.112882  | 0.001337  |
| H      | -5.873851 | 1.948044  | -0.001337 |
| C      | -2.626524 | -0.737927 | -0.003846 |
| C      | -4.075285 | -0.760673 | -0.000111 |
| C      | -1.952325 | -1.905673 | 0.003846  |
| C      | -4.790599 | -1.931217 | 0.000080  |
| C      | -2.696405 | -3.148964 | 0.000111  |
| C      | -4.067782 | -3.183172 | -0.000080 |
| H      | -5.873851 | -1.948044 | 0.001337  |
| H      | -4.623981 | -4.112882 | -0.001337 |
| C      | -1.378880 | -3.909637 | -0.000111 |
| C      | -0.722817 | -5.114389 | 0.000080  |
| C      | -0.674199 | -2.643600 | -0.003846 |
| C      | 0.722817  | -5.114389 | -0.000080 |
| H      | -1.249870 | -6.060926 | 0.001337  |
| C      | 0.674199  | -2.643600 | 0.003846  |
| C      | 1.378880  | -3.909637 | 0.000111  |
| H      | 1.249870  | -6.060926 | -0.001337 |
| C      | 1.952325  | -1.905673 | -0.003846 |
| C      | 2.626524  | -0.737927 | 0.003846  |
| C      | 2.696405  | -3.148964 | -0.000111 |
| C      | 4.075285  | -0.760673 | 0.000111  |
| C      | 4.067782  | -3.183172 | 0.000080  |
| C      | 4.790599  | -1.931217 | -0.000080 |
| H      | 4.623981  | -4.112882 | 0.001337  |
| H      | 5.873851  | -1.948044 | -0.001337 |
| C      | 2.626524  | 0.737927  | -0.003846 |
| C      | 4.075285  | 0.760673  | -0.000111 |
| C      | 1.952325  | 1.905673  | 0.003846  |
| C      | 4.790599  | 1.931217  | 0.000080  |

|   |          |          |           |
|---|----------|----------|-----------|
| C | 2.696405 | 3.148964 | 0.000111  |
| C | 4.067782 | 3.183172 | -0.000080 |
| H | 5.873851 | 1.948044 | 0.001337  |
| H | 4.623981 | 4.112882 | -0.001337 |

Zero-point correction= 0.343179 (Hartree/Particle)

Thermal correction to Energy= 0.365095

Thermal correction to Enthalpy= 0.366039

Thermal correction to Gibbs Free Energy= 0.296343

Sum of electronic and zero-point Energies= -1378.792650

Sum of electronic and thermal Energies= -1378.770735

Sum of electronic and thermal Enthalpies= -1378.769790

Sum of electronic and thermal Free Energies= -1378.839486

Compound 1

| Symbol | X         | Y         | Z         |
|--------|-----------|-----------|-----------|
| C      | -0.689284 | 3.661853  | 0.058999  |
| C      | -0.740550 | 2.617111  | 1.125600  |
| S      | -2.190924 | 3.794792  | -0.888449 |
| C      | -1.896209 | 1.949891  | 1.125600  |
| C      | -2.826616 | 2.427864  | 0.058999  |
| C      | -3.515900 | 1.233989  | 0.058999  |
| C      | -2.636760 | 0.667220  | 1.125600  |
| S      | -4.381848 | 0.000000  | -0.888449 |
| C      | -2.636760 | -0.667220 | 1.125600  |
| C      | -3.515900 | -1.233989 | 0.058999  |
| C      | 0.689284  | 3.661853  | 0.058999  |
| C      | 0.740550  | 2.617111  | 1.125600  |
| S      | 2.190924  | 3.794792  | -0.888449 |
| C      | 1.896209  | 1.949891  | 1.125600  |
| C      | 2.826616  | 2.427864  | 0.058999  |
| C      | -2.826616 | -2.427864 | 0.058999  |
| C      | -1.896209 | -1.949891 | 1.125600  |
| S      | -2.190924 | -3.794792 | -0.888449 |
| C      | -0.740550 | -2.617111 | 1.125600  |
| C      | -0.689284 | -3.661853 | 0.058999  |
| C      | 0.689284  | -3.661853 | 0.058999  |
| C      | 0.740550  | -2.617111 | 1.125600  |
| S      | 2.190924  | -3.794792 | -0.888449 |
| C      | 1.896209  | -1.949891 | 1.125600  |
| C      | 2.826616  | -2.427864 | 0.058999  |
| C      | 3.515900  | -1.233989 | 0.058999  |
| C      | 2.636760  | -0.667220 | 1.125600  |
| S      | 4.381848  | 0.000000  | -0.888449 |
| C      | 2.636760  | 0.667220  | 1.125600  |
| C      | 3.515900  | 1.233989  | 0.058999  |

Zero-point correction= 0.143299 (Hartree/Particle)

Thermal correction to Energy= 0.163928

Thermal correction to Enthalpy= 0.164873

Thermal correction to Gibbs Free Energy= 0.096452

Sum of electronic and zero-point Energies= -3303.318346

Sum of electronic and thermal Energies= -3303.297717

Sum of electronic and thermal Enthalpies= -3303.296772

Sum of electronic and thermal Free Energies= -3303.365193

Compound 2

| Symbol | X         | Y         | Z         |
|--------|-----------|-----------|-----------|
| C      | 0.689093  | 4.273768  | 0.051217  |
| C      | 0.739690  | 3.072343  | 0.936745  |
| S      | 2.236946  | 4.645066  | -0.740972 |
| C      | 1.940865  | 2.493887  | 0.936745  |
| C      | 2.911724  | 3.203405  | 0.051217  |
| C      | 3.771009  | 2.125896  | 0.051217  |
| C      | 2.863243  | 1.337262  | 0.936745  |
| S      | 5.026372  | 1.147237  | -0.740972 |
| C      | 3.159909  | 0.037484  | 0.936745  |
| C      | 4.319953  | -0.279187 | 0.051217  |
| C      | -0.689093 | 4.273768  | 0.051217  |
| C      | -0.739690 | 3.072343  | 0.936745  |
| S      | -2.236946 | 4.645066  | -0.740972 |
| C      | -1.940865 | 2.493887  | 0.936745  |
| C      | -2.911724 | 3.203405  | 0.051217  |
| C      | 4.013278  | -1.622819 | 0.051217  |
| C      | 2.830716  | -1.404805 | 0.936745  |
| S      | 4.030837  | -3.214485 | -0.740972 |
| C      | 1.999477  | -2.447146 | 0.936745  |
| C      | 2.475170  | -3.551546 | 0.051217  |
| C      | -2.475170 | -3.551546 | 0.051217  |
| C      | -1.999477 | -2.447146 | 0.936745  |
| S      | -4.030837 | -3.214485 | -0.740972 |
| C      | -2.830716 | -1.404805 | 0.936745  |
| C      | -4.013278 | -1.622819 | 0.051217  |
| C      | -4.319953 | -0.279187 | 0.051217  |
| C      | -3.159909 | 0.037484  | 0.936745  |
| S      | -5.026372 | 1.147237  | -0.740972 |
| C      | -2.863243 | 1.337262  | 0.936745  |
| C      | -3.771009 | 2.125896  | 0.051217  |
| C      | 1.233467  | -4.149518 | 0.051217  |
| C      | 0.666602  | -3.089025 | 0.936745  |
| S      | 0.000000  | -5.155634 | -0.740972 |
| C      | -0.666602 | -3.089025 | 0.936745  |
| C      | -1.233467 | -4.149518 | 0.051217  |

Zero-point correction= 0.166208 (Hartree/Particle)

Thermal correction to Energy= 0.191250

Thermal correction to Enthalpy= 0.192194

Thermal correction to Gibbs Free Energy= 0.114316

Sum of electronic and zero-point Energies= -3853.897978

Sum of electronic and thermal Energies= -3853.872935

Sum of electronic and thermal Enthalpies= -3853.871991

Sum of electronic and thermal Free Energies= -3853.949870



Compound 3

| Symbol | X         | Y         | Z         |
|--------|-----------|-----------|-----------|
| C      | 2.187552  | 4.423020  | 0.038034  |
| C      | 1.379262  | 3.329834  | 0.655001  |
| C      | 0.074735  | 3.600075  | 0.646166  |
| C      | -0.226148 | 4.927930  | 0.035460  |
| S      | 1.217574  | 5.804583  | -0.515498 |
| C      | -1.580714 | 4.674380  | 0.038034  |
| C      | -1.379262 | 3.329834  | 0.655001  |
| S      | -3.243505 | 4.965414  | -0.515498 |
| C      | -2.492792 | 2.598483  | 0.646166  |
| C      | -3.644484 | 3.324662  | 0.035460  |
| C      | 3.324662  | 3.644484  | 0.035460  |
| C      | 2.598483  | 2.492792  | 0.646166  |
| S      | 4.965414  | 3.243505  | -0.515498 |
| C      | 3.329834  | 1.379262  | 0.655001  |
| C      | 4.674380  | 1.580714  | 0.038034  |
| C      | -4.423020 | 2.187552  | 0.038034  |
| C      | -3.329834 | 1.379262  | 0.655001  |
| S      | -5.804583 | 1.217574  | -0.515498 |
| C      | -3.600075 | 0.074735  | 0.646166  |
| C      | -4.927930 | -0.226148 | 0.035460  |
| C      | 4.927930  | 0.226148  | 0.035460  |
| C      | 3.600075  | -0.074735 | 0.646166  |
| S      | 5.804583  | -1.217574 | -0.515498 |
| C      | 3.329834  | -1.379262 | 0.655001  |
| C      | 4.423020  | -2.187552 | 0.038034  |
| C      | -4.674380 | -1.580714 | 0.038034  |
| C      | -3.329834 | -1.379262 | 0.655001  |
| S      | -4.965414 | -3.243505 | -0.515498 |
| C      | -2.598483 | -2.492792 | 0.646166  |
| C      | -3.324662 | -3.644484 | 0.035460  |
| C      | -2.187552 | -4.423020 | 0.038034  |
| C      | -1.379262 | -3.329834 | 0.655001  |
| S      | -1.217574 | -5.804583 | -0.515498 |
| C      | -0.074735 | -3.600075 | 0.646166  |
| C      | 0.226148  | -4.927930 | 0.035460  |
| C      | 1.580714  | -4.674380 | 0.038034  |
| C      | 1.379262  | -3.329834 | 0.655001  |
| S      | 3.243505  | -4.965414 | -0.515498 |
| C      | 2.492792  | -2.598483 | 0.646166  |
| C      | 3.644484  | -3.324662 | 0.035460  |

Zero-point correction= 0.189721 (Hartree/Particle)

Thermal correction to Energy= 0.218981

Thermal correction to Enthalpy= 0.219925

Thermal correction to Gibbs Free Energy= 0.132694  
Sum of electronic and zero-point Energies= -4404.473706  
Sum of electronic and thermal Energies= -4404.444446  
Sum of electronic and thermal Enthalpies= -4404.443502  
Sum of electronic and thermal Free Energies= -4404.530733

## Compound 4

| Symbol | X         | Y         | Z         |
|--------|-----------|-----------|-----------|
| C      | 1.228012  | 5.383871  | 0.001056  |
| C      | 0.666779  | 3.999920  | 0.006599  |
| C      | -0.666779 | 3.999920  | -0.006599 |
| C      | -1.228012 | 5.383871  | -0.001056 |
| S      | 0.000000  | 6.662268  | 0.000000  |
| C      | -5.088836 | 2.144255  | 0.001056  |
| C      | -3.823368 | 1.351228  | 0.006599  |
| S      | -6.561053 | 1.156891  | 0.000000  |
| C      | -4.054938 | 0.037930  | -0.006599 |
| C      | -5.515320 | -0.274456 | -0.001056 |
| C      | 2.519974  | 4.913636  | -0.001056 |
| C      | 2.060317  | 3.492714  | -0.006599 |
| S      | 4.282423  | 5.103593  | 0.000000  |
| C      | 3.081882  | 2.635519  | 0.006599  |
| C      | 4.401398  | 3.334934  | 0.001056  |
| C      | -5.276575 | -1.628446 | 0.001056  |
| C      | -3.797422 | -1.422513 | 0.006599  |
| S      | -5.769693 | -3.331134 | 0.000000  |
| C      | -3.130643 | -2.577408 | -0.006599 |
| C      | -4.048563 | -3.755425 | -0.001056 |
| C      | 5.088836  | 2.144255  | -0.001056 |
| C      | 3.823368  | 1.351228  | -0.006599 |
| S      | 6.561053  | 1.156891  | 0.000000  |
| C      | 4.054938  | 0.037930  | 0.006599  |
| C      | 5.515320  | -0.274456 | 0.001056  |
| C      | -2.995346 | -4.639179 | 0.001056  |
| C      | -1.994621 | -3.530644 | 0.006599  |
| S      | -2.278630 | -6.260484 | 0.000000  |
| C      | -0.741486 | -3.986748 | -0.006599 |
| C      | -0.687439 | -5.479189 | -0.001056 |
| C      | 0.687439  | -5.479189 | 0.001056  |
| C      | 0.741486  | -3.986748 | 0.006599  |
| S      | 2.278630  | -6.260484 | 0.000000  |
| C      | 1.994621  | -3.530644 | -0.006599 |
| C      | 2.995346  | -4.639179 | -0.001056 |
| C      | 4.048563  | -3.755425 | 0.001056  |
| C      | 3.130643  | -2.577408 | 0.006599  |
| S      | 5.769693  | -3.331134 | 0.000000  |
| C      | 3.797422  | -1.422513 | -0.006599 |
| C      | 5.276575  | -1.628446 | -0.001056 |
| C      | -4.401398 | 3.334934  | -0.001056 |
| C      | -3.081882 | 2.635519  | -0.006599 |
| S      | -4.282423 | 5.103593  | 0.000000  |
| C      | -2.060317 | 3.492714  | 0.006599  |

C      -2.519974    4.913636    0.001056

Zero-point correction= 0.215163 (Hartree/Particle)

Thermal correction to Energy= 0.248079

Thermal correction to Enthalpy= 0.249024

Thermal correction to Gibbs Free Energy= 0.153444

Sum of electronic and zero-point Energies= -4955.045438

Sum of electronic and thermal Energies= -4955.012521

Sum of electronic and thermal Enthalpies= -4955.011577

Sum of electronic and thermal Free Energies= -4955.107157

# Benzene

| Symbol | X         | Y         | Z        |
|--------|-----------|-----------|----------|
| C      | 0.000000  | 1.394084  | 0.000000 |
| C      | 1.207312  | 0.697042  | 0.000000 |
| C      | 1.207312  | -0.697042 | 0.000000 |
| C      | 0.000000  | -1.394084 | 0.000000 |
| C      | -1.207312 | -0.697042 | 0.000000 |
| C      | -1.207312 | 0.697042  | 0.000000 |
| H      | 0.000000  | 2.478099  | 0.000000 |
| H      | 2.146096  | 1.239049  | 0.000000 |
| H      | 2.146096  | -1.239049 | 0.000000 |
| H      | 0.000000  | -2.478099 | 0.000000 |
| H      | -2.146096 | -1.239049 | 0.000000 |
| H      | -2.146096 | 1.239049  | 0.000000 |

Zero-point correction= 0.100196 (Hartree/Particle)

Thermal correction to Energy= 0.104594

Thermal correction to Enthalpy= 0.105538

Thermal correction to Gibbs Free Energy= 0.075078

Sum of electronic and zero-point Energies= -232.229965

Sum of electronic and thermal Energies= -232.225567

Sum of electronic and thermal Enthalpies= -232.224623

Sum of electronic and thermal Free Energies= -232.255083

# Thiophene

| Symbol | X        | Y         | Z         |
|--------|----------|-----------|-----------|
| C      | 0.000000 | 1.240808  | -0.011488 |
| C      | 0.000000 | 0.713872  | -1.271779 |
| C      | 0.000000 | -0.713872 | -1.271779 |
| C      | 0.000000 | -1.240808 | -0.011488 |
| S      | 0.000000 | 0.000000  | 1.198239  |
| H      | 0.000000 | 2.278766  | 0.282133  |
| H      | 0.000000 | 1.318698  | -2.168442 |
| H      | 0.000000 | -1.318698 | -2.168442 |
| H      | 0.000000 | -2.278766 | 0.282133  |

Zero-point correction= 0.066406 (Hartree/Particle)

Thermal correction to Energy= 0.070488

Thermal correction to Enthalpy= 0.071432

Thermal correction to Gibbs Free Energy= 0.039823

Sum of electronic and zero-point Energies= -553.022090

Sum of electronic and thermal Energies= -553.018008

Sum of electronic and thermal Enthalpies= -553.017064

Sum of electronic and thermal Free Energies= -553.048673

Cyclobutadiene

| Symbol | X        | Y         | Z         |
|--------|----------|-----------|-----------|
| C      | 0.000000 | 0.666964  | 0.789636  |
| H      | 0.000000 | 1.433422  | 1.551832  |
| C      | 0.000000 | 0.666964  | -0.789636 |
| H      | 0.000000 | 1.433422  | -1.551832 |
| C      | 0.000000 | -0.666964 | -0.789636 |
| H      | 0.000000 | -1.433422 | -1.551832 |
| C      | 0.000000 | -0.666964 | 0.789636  |
| H      | 0.000000 | -1.433422 | 1.551832  |

Zero-point correction= 0.060887 (Hartree/Particle)

Thermal correction to Energy= 0.064670

Thermal correction to Enthalpy= 0.065614

Thermal correction to Gibbs Free Energy= 0.036893

Sum of electronic and zero-point Energies= -154.668944

Sum of electronic and thermal Energies= -154.665161

Sum of electronic and thermal Enthalpies= -154.664217

Sum of electronic and thermal Free Energies= -154.692937
